# Supplementary material
Source: Springer Nature journal article supplement (https://www.springermedizin.de/resource/supplementary/12889_2009_2007_MOESM1_ESM.pdf/9487294)

## Erectile dysfunction (ED)

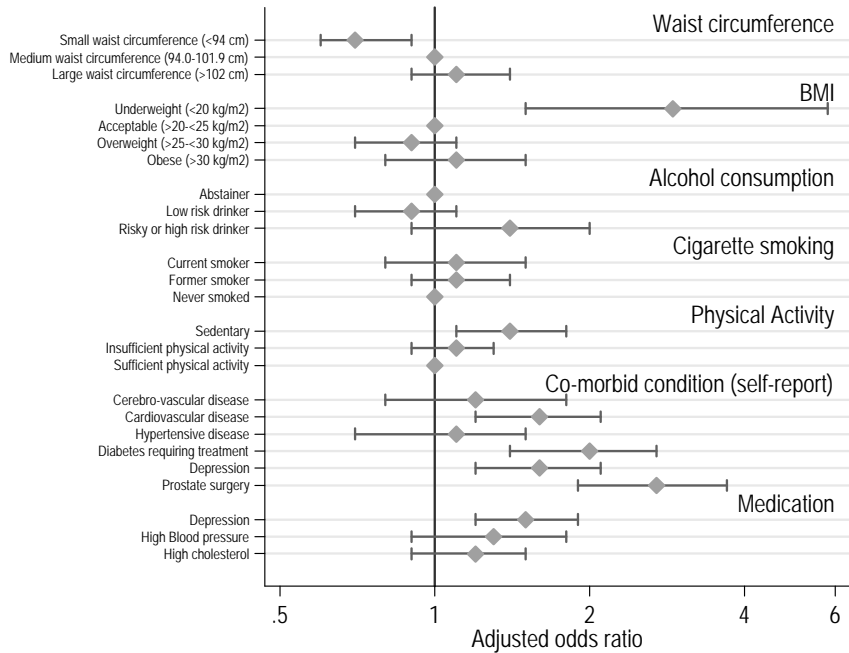

## Lower urinary tract symptoms (LUTS)

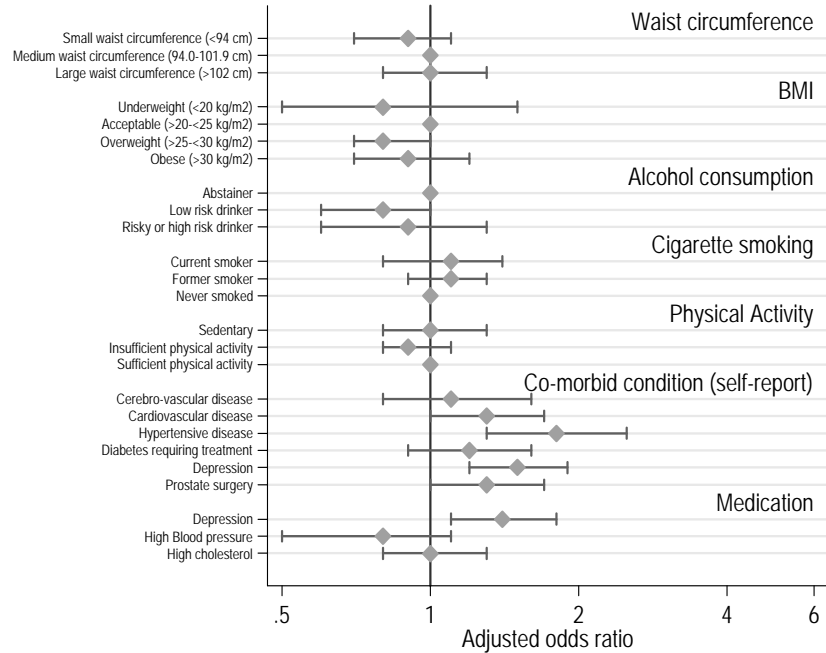

## Prostate Disease (PD)

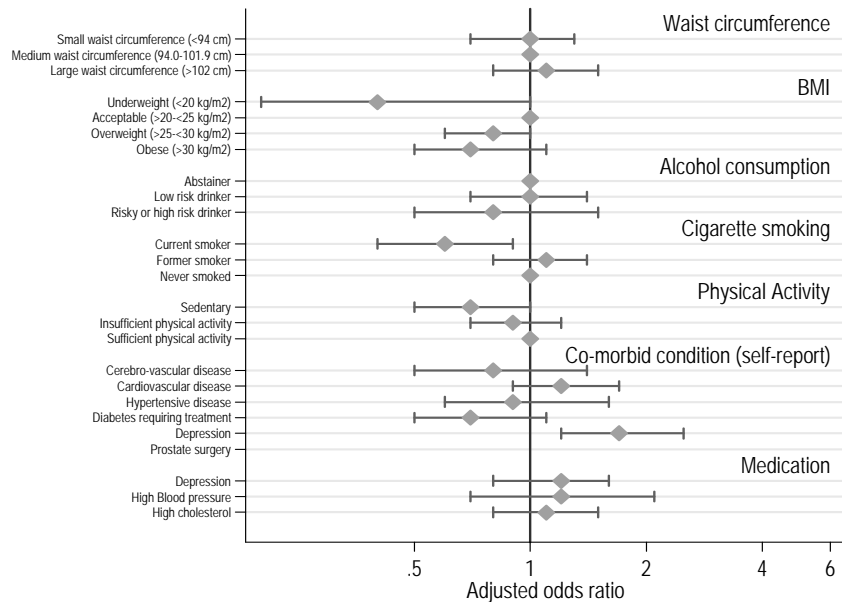

## Perceived androgen deficiency (pAD)

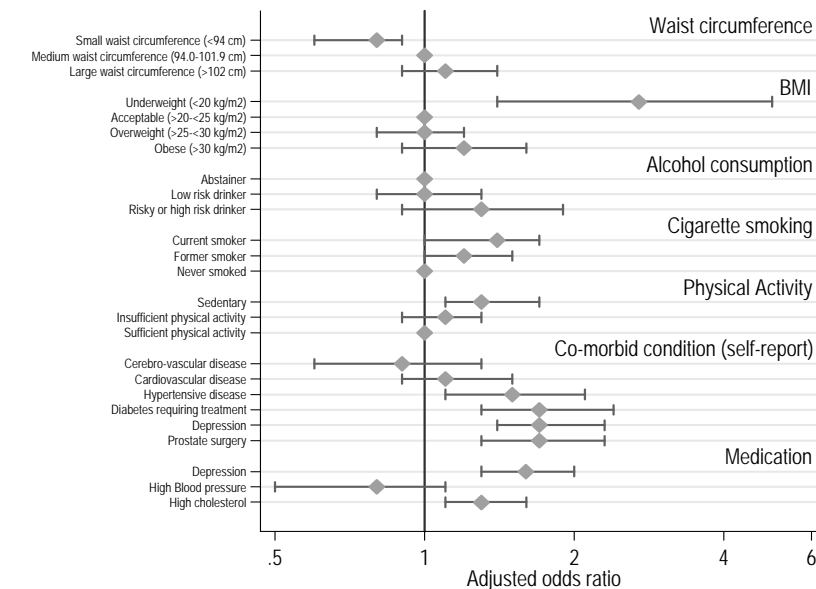

Supplement: MOESM1 [file 9487294]
